# Supplementary material for: A perspective on oxygenated species in the refinery integration of pyrolysis oil
Source: Royal Society of Chemistry journal article supplement (doi:10.1039/c3gc41951g), 2013-11-26
Supplement: c3gc41951g.pdf [file c3gc41951g.pdf]

## Crude Oil Assays

| Gippsland Blend                                                                                                                                                                                                                                                                                                               | Whole crude  | Butane & Lighter | Light Naphtha | Heavy Naphtha | Kerosene   | Diesel     | Vacuum Gas Oil | Vacuum Residue |
|-------------------------------------------------------------------------------------------------------------------------------------------------------------------------------------------------------------------------------------------------------------------------------------------------------------------------------|--------------|------------------|---------------|---------------|------------|------------|----------------|----------------|
| Distillation Range, F                                                                                                                                                                                                                                                                                                         | -200 to 1499 | -200 to 60       | 60 to 165     | 165 to 330    | 330 to 480 | 480 to 650 | 650 to 1000    | 1000 to 1499   |
| Cut volume, %                                                                                                                                                                                                                                                                                                                 | 100.00       | 0.44             | 6.32          | 35.80         | 27.68      | 20.07      | 9.19           | 0.49           |
| API Gravity,                                                                                                                                                                                                                                                                                                                  | 49.00        | 117.28           | 79.57         | 60.34         | 47.73      | 35.53      | 25.39          | -0.08          |
| Specific Gravity (60/60F),                                                                                                                                                                                                                                                                                                    | 0.7839       | 0.5688           | 0.6704        | 0.7376        | 0.7895     | 0.8472     | 0.9019         | 1.0767         |
| Carbon, wt %                                                                                                                                                                                                                                                                                                                  |              | 82.56            | 83.66         | 84.73         | 85.50      | 86.56      | 87.27          |                |
| Hydrogen, wt %                                                                                                                                                                                                                                                                                                                |              | 17.44            | 16.34         | 15.27         | 14.50      | 13.42      | 12.59          |                |
| Pour point, F                                                                                                                                                                                                                                                                                                                 | -65.00       |                  |               |               | -55.00     | 13.00      | 88.00          | 109.00         |
| Neutralization number (TAN), MG/GM                                                                                                                                                                                                                                                                                            | 0.0500       |                  |               |               |            | 0.0540     | 0.0510         | 0.1060         |
| Sulfur, wt%                                                                                                                                                                                                                                                                                                                   | 0.0140       |                  |               | 0.0000        | 0.0006     | 0.0185     | 0.1054         | 0.4991         |
| Viscosity at 20C/68F, cSt                                                                                                                                                                                                                                                                                                     | 1.65         | 0.35             | 0.41          | 0.73          | 2.01       | 6.82       | 76.33          | 2.18E+08       |
| Viscosity at 40C/104F, cSt                                                                                                                                                                                                                                                                                                    | 1.30         | 0.30             | 0.35          | 0.60          | 1.45       | 3.90       | 27.33          | 3.18E+06       |
| Viscosity at 50C/122F, cSt                                                                                                                                                                                                                                                                                                    | 1.17         | 0.28             | 0.32          | 0.55          | 1.26       | 3.12       | 18.20          | 5.96E+05       |
| Mercaptan sulfur, ppm                                                                                                                                                                                                                                                                                                         | 0.00         |                  |               | 0.10          | 0.70       |            |                |                |
| Nitrogen, ppm                                                                                                                                                                                                                                                                                                                 | 57.00        | 0.00             | 0.00          | 0.00          | 0.20       | 9.70       | 331.40         | 4,108.00       |
| CCR, wt%                                                                                                                                                                                                                                                                                                                      | 0.22         |                  |               |               |            | 0.00       | 0.06           | 33.63          |
| N-Heptane Insolubles (C7 Asphaltenes), wt%                                                                                                                                                                                                                                                                                    |              |                  |               |               |            |            |                | 7.60           |
| Nickel, ppm                                                                                                                                                                                                                                                                                                                   | 2.10         |                  |               |               |            | 0.00       | 0.30           | 76.50          |
| Vanadium, ppm                                                                                                                                                                                                                                                                                                                 | 0.10         | 0.00             | 0.00          | 0.00          | 0.00       | 0.00       | 0.00           | 12.00          |
| Calcium, ppm                                                                                                                                                                                                                                                                                                                  | 1.00         |                  |               |               |            |            |                |                |
| Reid Vapor Pressure (RVP) Whole Crude, psi                                                                                                                                                                                                                                                                                    | 2.10         |                  |               |               |            |            |                |                |
| Heat of Combustion (Gross), BTU/lb                                                                                                                                                                                                                                                                                            | 20,308       |                  |               |               |            |            |                |                |
| Heat of Combustion (Net), BTU/lb                                                                                                                                                                                                                                                                                              | 18,724       | 19,775           | 19,197        | 18,924        | 18,743     |            |                |                |
| Hydrogen Sulfide (dissolved), ppm                                                                                                                                                                                                                                                                                             | 0.00         |                  |               |               |            |            |                |                |
| Salt content, ptb                                                                                                                                                                                                                                                                                                             | 7.10         |                  |               |               |            |            |                |                |
| Paraffins, vol %                                                                                                                                                                                                                                                                                                              |              | 100.00           | 93.79         | 64.88         | 54.56      | 50.75      | 37.36          |                |
| Naphthenes, vol %                                                                                                                                                                                                                                                                                                             |              | 0.00             | 6.20          | 34.12         | 38.28      | 28.46      | 29.25          |                |
| Aromatics (FIA), vol %                                                                                                                                                                                                                                                                                                        |              |                  |               | 1.00          | 6.28       |            |                |                |
| Distillation type, D-                                                                                                                                                                                                                                                                                                         | 1160         | 86               | 86            | 86            | 86         | 86         | 1160           | 1160           |
| ASTM IBP, F                                                                                                                                                                                                                                                                                                                   | 118.1        | -73.9            | 106.2         | 207.1         | 363.4      | 501.0      | 685.4          | 1,036.4        |
| 5 vol%, F                                                                                                                                                                                                                                                                                                                     | 173.8        | -24.5            | 112.0         | 213.7         | 367.4      | 504.7      | 690.5          | 1,041.4        |
| 10 vol%, F                                                                                                                                                                                                                                                                                                                    | 207.4        | 19.0             | 114.8         | 218.7         | 368.9      | 506.6      | 692.2          | 1,044.8        |
| 20 vol%, F                                                                                                                                                                                                                                                                                                                    | 241.1        | 26.5             | 120.6         | 224.4         | 373.2      | 510.9      | 698.1          | 1,054.7        |
| 30 vol%, F                                                                                                                                                                                                                                                                                                                    | 277.7        | 28.9             | 128.2         | 229.5         | 379.2      | 516.5      | 705.5          | 1,066.6        |
| 40 vol%, F                                                                                                                                                                                                                                                                                                                    | 323.4        | 28.8             | 131.3         | 235.6         | 386.9      | 521.5      | 717.2          | 1,083.1        |
| 50 vol%, F                                                                                                                                                                                                                                                                                                                    | 371.7        | 30.6             | 133.3         | 242.7         | 394.8      | 527.4      | 732.4          | 1,106.6        |
| 60 vol%, F                                                                                                                                                                                                                                                                                                                    | 426.4        | 34.9             | 138.1         | 252.0         | 403.8      | 535.5      | 754.0          | 1,146.2        |
| 70 vol%, F                                                                                                                                                                                                                                                                                                                    | 476.4        | 39.0             | 142.5         | 263.2         | 412.7      | 546.4      | 778.1          | 1,196.9        |
| 80 vol%, F                                                                                                                                                                                                                                                                                                                    | 532.9        | 42.9             | 146.5         | 275.9         | 422.3      | 561.3      | 807.6          | 1,261.9        |
| 90 vol%, F                                                                                                                                                                                                                                                                                                                    | 613.9        | 42.9             | 146.7         | 289.1         | 432.6      | 579.4      | 840.2          | 1,340.9        |
| 95 vol%, F                                                                                                                                                                                                                                                                                                                    | 692.6        | 44.0             | 147.9         | 296.3         | 438.9      | 589.8      | 875.3          | 1,392.7        |
| ASTM EP, F                                                                                                                                                                                                                                                                                                                    | 958.2        | 45.9             | 149.7         | 307.6         | 449.5      | 603.3      | 960.4          | 1,453.4        |
| Freeze point, F                                                                                                                                                                                                                                                                                                               |              |                  |               |               | -39.10     | 27.10      |                |                |
| Smoke point, mm                                                                                                                                                                                                                                                                                                               |              |                  |               |               | 29.40      |            |                |                |
| Naphthalenes (D1840), vol%                                                                                                                                                                                                                                                                                                    |              |                  |               |               | 0.90       |            |                |                |
| Viscosity at 100C/212F, cSt                                                                                                                                                                                                                                                                                                   | 0.77         | 0.21             | 0.24          | 0.38          | 0.74       | 1.42       | 4.58           | 2,274.89       |
| Viscosity at 150C/302F, cSt                                                                                                                                                                                                                                                                                                   | 0.57         | 0.17             | 0.19          | 0.28          | 0.50       | 0.86       | 2.09           | 122.19         |
| Cetane Index 1990 (D4737),                                                                                                                                                                                                                                                                                                    | 46.90        | 122.50           | 45.40         | 38.40         | 53.60      | 55.60      | 57.40          | 16.50          |
| Cloud point, F                                                                                                                                                                                                                                                                                                                |              |                  |               |               | -46.00     | 20.00      |                |                |
| Aniline pt, F                                                                                                                                                                                                                                                                                                                 |              |                  |               |               | 158.00     | 165.90     | 188.20         |                |
| <b>Source:</b> ExxonMobil Refining & Supply. "Crude Oil Information: Crudes by American Petroleum Institute Gravity," <i>ExxonMobil Refining &amp; Supply website</i> . Web. 13 June 2013.<br><a href="http://www.exxonmobil.com/crudeoil/about_crudes_api.aspx">http://www.exxonmobil.com/crudeoil/about_crudes_api.aspx</a> |              |                  |               |               |            |            |                |                |

| <b>Brent Blend</b>                         | <b>Whole crude</b> | <b>Butane &amp; Lighter</b> | <b>Light Naphtha</b> | <b>Heavy Naphtha</b> | <b>Kerosene</b> | <b>Diesel</b> | <b>Vacuum Gas Oil</b> | <b>Vacuum Residue</b> |
|--------------------------------------------|--------------------|-----------------------------|----------------------|----------------------|-----------------|---------------|-----------------------|-----------------------|
| Distillation Range, F                      | -200 to 1499       | -200 to 60                  | 60 to 165            | 165 to 330           | 330 to 480      | 480 to 650    | 650 to 1000           | 1000 to 1499          |
| Cut volume, %                              | 100.00             | 2.55                        | 8.95                 | 19.39                | 14.97           | 17.20         | 25.48                 | 11.46                 |
| API Gravity,                               | 38.50              | 118.54                      | 82.04                | 56.07                | 42.88           | 34.80         | 24.86                 | 10.81                 |
| Specific Gravity (60/60F),                 | 0.8324             | 0.5659                      | 0.6626               | 0.7544               | 0.8115          | 0.8508        | 0.9050                | 0.9943                |
| Carbon, wt %                               | 85.99              | 82.50                       | 83.90                | 85.83                | 86.18           | 86.38         | 86.46                 |                       |
| Hydrogen, wt %                             | 13.53              | 17.50                       | 16.10                | 14.17                | 13.81           | 13.33         | 12.81                 |                       |
| Pour point, F                              | 32.00              |                             |                      |                      | -69.00          | 10.00         | 100.00                | 97.00                 |
| Neutralization number (TAN), MG/GM         | 0.0900             |                             |                      |                      |                 | 0.1340        | 0.1150                | 0.1660                |
| Sulfur, wt%                                | 0.4060             |                             |                      | 0.0024               | 0.0327          | 0.2585        | 0.6079                | 1.3673                |
| Viscosity at 20C/68F, cSt                  | 4.89               | 0.35                        | 0.41                 | 0.74                 | 1.87            | 7.06          | 125.57                | 1.91E+06              |
| Viscosity at 40C/104F, cSt                 | 3.15               | 0.30                        | 0.35                 | 0.61                 | 1.36            | 4.01          | 41.57                 | 9.89E+04              |
| Viscosity at 50C/122F, cSt                 | 2.63               | 0.28                        | 0.32                 | 0.56                 | 1.19            | 3.20          | 26.81                 | 3.01E+04              |
| Mercaptan sulfur, ppm                      | 20.00              |                             |                      | 7.70                 | 3.50            |               |                       |                       |
| Nitrogen, ppm                              | 970.00             | 0.00                        | 0.00                 | 0.00                 | 0.20            | 54.20         | 899.40                | 5,202.00              |
| CCR, wt%                                   | 2.18               |                             |                      |                      |                 | 0.00          | 0.23                  | 15.50                 |
| N-Heptane Insolubles (C7 Asphaltenes), wt% |                    |                             |                      |                      |                 |               |                       | 2.30                  |
| Nickel, ppm                                | 1.30               |                             |                      |                      |                 | 0.00          | 0.00                  | 9.50                  |
| Vanadium, ppm                              | 5.90               | 0.00                        | 0.00                 | 0.00                 | 0.00            | 0.00          | 0.00                  | 43.10                 |
| Calcium, ppm                               | 0.50               |                             |                      |                      |                 |               |                       |                       |
| Reid Vapor Pressure (RVP) Whole Crude, psi | 9.20               |                             |                      |                      |                 |               |                       |                       |
| Heat of Combustion (Gross), BTU/lb         | 19,688             |                             |                      |                      |                 |               |                       |                       |
| Heat of Combustion (Net), BTU/lb           | 18,459             | 19,266                      | 18,869               | 18,653               | 18,584          |               |                       |                       |
| Hydrogen Sulfide (dissolved), ppm          | 0.00               |                             |                      |                      |                 |               |                       |                       |
| Salt content, ptb                          | 2.30               |                             |                      |                      |                 |               |                       |                       |
| Paraffins, vol %                           |                    | 100.00                      | 85.61                | 47.08                | 41.03           | 40.38         | 23.55                 |                       |
| Naphthenes, vol %                          |                    | 0.00                        | 12.87                | 38.46                | 42.44           | 37.18         | 39.69                 |                       |
| Aromatics (FIA), vol %                     |                    |                             |                      | 14.46                | 14.92           |               |                       |                       |
| Distillation type, D-                      | 1160               | 86                          | 86                   | 86                   | 86              | 86            | 1160                  | 1160                  |
| ASTM IBP, F                                | 9.0                | -92.6                       | 94.1                 | 205.7                | 363.5           | 505.7         | 689.9                 | 1,038.6               |
| 5 vol%, F                                  | 102.0              | -50.4                       | 99.0                 | 210.3                | 367.8           | 510.5         | 694.3                 | 1,042.9               |
| 10 vol%, F                                 | 157.4              | -2.9                        | 102.8                | 212.4                | 369.8           | 512.7         | 705.1                 | 1,052.1               |
| 20 vol%, F                                 | 232.6              | 29.2                        | 106.9                | 216.8                | 374.6           | 518.6         | 727.2                 | 1,071.8               |
| 30 vol%, F                                 | 316.3              | 36.0                        | 111.0                | 222.8                | 380.6           | 525.8         | 752.4                 | 1,095.7               |
| 40 vol%, F                                 | 411.1              | 38.0                        | 113.6                | 230.6                | 388.0           | 534.3         | 779.7                 | 1,123.2               |
| 50 vol%, F                                 | 508.4              | 37.3                        | 117.9                | 239.3                | 395.4           | 542.5         | 808.7                 | 1,155.9               |
| 60 vol%, F                                 | 609.5              | 41.5                        | 125.7                | 249.9                | 404.2           | 552.2         | 837.7                 | 1,198.4               |
| 70 vol%, F                                 | 716.7              | 45.6                        | 131.6                | 261.5                | 413.4           | 562.7         | 865.8                 | 1,248.1               |
| 80 vol%, F                                 | 830.8              | 48.5                        | 137.4                | 274.5                | 423.5           | 574.4         | 895.6                 | 1,306.8               |
| 90 vol%, F                                 | 970.3              | 47.0                        | 140.7                | 288.1                | 433.9           | 586.8         | 926.7                 | 1,373.4               |
| 95 vol%, F                                 | 1,107.3            | 46.7                        | 143.6                | 295.6                | 439.7           | 593.8         | 946.5                 | 1,415.9               |
| ASTM EP, F                                 | 1,389.2            | 47.6                        | 146.3                | 307.3                | 444.4           | 604.8         | 970.0                 | 1,457.8               |
| Freeze point, F                            |                    |                             |                      |                      | -48.00          | 27.40         |                       |                       |
| Smoke point, mm                            |                    |                             |                      |                      | 20.70           |               |                       |                       |
| Naphthalenes (D1840), vol%                 |                    |                             |                      |                      | 3.60            |               |                       |                       |
| Viscosity at 100C/212F, cSt                | 1.36               | 0.21                        | 0.23                 | 0.38                 | 0.71            | 1.44          | 6.03                  | 524.76                |
| Viscosity at 150C/302F, cSt                | 0.88               | 0.17                        | 0.18                 | 0.28                 | 0.48            | 0.87          | 2.59                  | 56.69                 |
| Cetane Index 1990 (D4737),                 | 37.50              | 134.90                      | 45.00                | 29.00                | 43.20           | 55.80         | 57.20                 | 40.90                 |
| Cloud point, F                             |                    |                             |                      |                      | -57.00          | 20.00         |                       |                       |
| Aniline pt, F                              |                    |                             |                      |                      | 142.90          | 163.30        | 191.30                |                       |

Source: ExxonMobil Refining & Supply. "Crude Oil Information: Crudes by American Petroleum Institute Gravity." ExxonMobil Refining & Supply website. Web. 13 June 2013.  
[http://www.exxonmobil.com/crudeoil/about\\_crudes\\_api.aspx](http://www.exxonmobil.com/crudeoil/about_crudes_api.aspx)

| <b>Alaskan North Slope</b>                 | <b>Whole crude</b> | <b>Butane &amp; Lighter</b> | <b>Light Naphtha</b> | <b>Heavy Naphtha</b> | <b>Kerosene</b> | <b>Diesel</b> | <b>Vacuum Gas Oil</b> | <b>Vacuum Residue</b> |
|--------------------------------------------|--------------------|-----------------------------|----------------------|----------------------|-----------------|---------------|-----------------------|-----------------------|
| Distillation Range, F                      | -200 to 1499       | -200 to 60                  | 60 to 165            | 165 to 330           | 330 to 480      | 480 to 650    | 650 to 1000           | 1000 to 1499          |
| Cut volume, %                              | 100.00             | 2.53                        | 7.98                 | 14.08                | 14.06           | 16.01         | 27.07                 | 18.26                 |
| API Gravity,                               | 31.40              | 113.65                      | 83.77                | 55.02                | 41.10           | 31.39         | 21.24                 | 6.87                  |
| Specific Gravity (60/60F),                 | 0.8686             | 0.5772                      | 0.6573               | 0.7586               | 0.8198          | 0.8687        | 0.9264                | 1.0226                |
| Carbon, wt %                               |                    | 82.64                       | 83.88                | 85.84                | 86.18           | 86.60         | 86.34                 |                       |
| Hydrogen, wt %                             |                    | 17.36                       | 16.12                | 14.16                | 13.74           | 12.86         | 12.30                 |                       |
| Pour point, F                              | -3.00              |                             |                      |                      | -69.00          | -2.00         | 88.00                 | 121.00                |
| Neutralization number (TAN), MG/GM         | 0.2000             |                             |                      |                      |                 | 0.1330        | 0.3400                | 0.1820                |
| Sulfur, wt%                                | 0.9580             |                             |                      | 0.0107               | 0.0929          | 0.5304        | 1.2117                | 2.3438                |
| Viscosity at 20C/68F, cSt                  | 12.22              | 0.35                        | 0.39                 | 0.71                 | 1.81            | 7.57          | 285.61                | 5.40E+08              |
| Viscosity at 40C/104F, cSt                 | 6.88               | 0.30                        | 0.34                 | 0.59                 | 1.33            | 4.25          | 75.53                 | 7.21E+06              |
| Viscosity at 50C/122F, cSt                 | 5.43               | 0.28                        | 0.31                 | 0.54                 | 1.16            | 3.37          | 44.80                 | 1.30E+06              |
| Mercaptan sulfur, ppm                      | 13.00              |                             |                      | 7.80                 | 8.90            |               |                       |                       |
| Nitrogen, ppm                              | 1,800.00           | 0.00                        | 0.00                 | 0.00                 | 1.10            | 74.70         | 1,307.20              | 6,321.50              |
| CCR, wt%                                   | 4.86               |                             |                      |                      |                 | 0.00          | 0.52                  | 21.76                 |
| N-Heptane Insolubles (C7 Asphaltenes), wt% |                    |                             |                      |                      |                 |               |                       | 7.30                  |
| Nickel, ppm                                | 11.00              |                             |                      |                      |                 | 0.00          | 0.00                  | 51.50                 |
| Vanadium, ppm                              | 24.80              |                             |                      |                      |                 | 0.00          | 0.00                  | 118.70                |
| Calcium, ppm                               | 0.50               |                             |                      |                      |                 |               |                       |                       |
| Reid Vapor Pressure (RVP) Whole Crude, psi | 6.30               |                             |                      |                      |                 |               |                       |                       |
| Heat of Combustion (Gross), BTU/lb         | 19,249             |                             |                      |                      |                 |               |                       |                       |
| Heat of Combustion (Net), BTU/lb           | 18,071             | 19,168                      | 18,855               | 18,599               | 18,491          |               |                       |                       |
| Hydrogen Sulfide (dissolved), ppm          | 0.00               |                             |                      |                      |                 |               |                       |                       |
| Salt content, ptb                          |                    |                             |                      |                      |                 |               |                       |                       |
| Paraffins, vol %                           |                    | 100.00                      | 84.67                | 43.29                | 36.76           | 31.56         | 19.11                 |                       |
| Naphthenes, vol %                          |                    | 0.00                        | 14.26                | 43.00                | 46.56           | 37.47         | 34.78                 |                       |
| Aromatics (FIA), vol %                     |                    |                             |                      | 13.71                | 21.24           |               |                       |                       |
| Distillation type, D-                      | 1160               | 86                          | 86                   | 86                   | 86              | 86            | 1160                  | 1160                  |
| ASTM IBP, F                                | 32.0               | -2.1                        | 94.6                 | 207.6                | 363.9           | 505.9         | 690.3                 | 1,039.0               |
| 5 vol%, F                                  | 98.8               | 24.9                        | 99.0                 | 212.7                | 368.4           | 510.6         | 694.9                 | 1,043.7               |
| 10 vol%, F                                 | 158.3              | 31.2                        | 102.7                | 215.1                | 370.6           | 512.6         | 706.4                 | 1,055.3               |
| 20 vol%, F                                 | 274.2              | 32.4                        | 107.3                | 221.6                | 375.8           | 518.5         | 729.5                 | 1,080.5               |
| 30 vol%, F                                 | 377.8              | 34.9                        | 112.3                | 229.5                | 382.1           | 525.8         | 755.5                 | 1,109.7               |
| 40 vol%, F                                 | 477.2              | 37.4                        | 116.0                | 238.9                | 389.5           | 534.6         | 783.5                 | 1,142.7               |
| 50 vol%, F                                 | 582.1              | 39.5                        | 119.1                | 247.6                | 396.7           | 543.1         | 813.8                 | 1,179.8               |
| 60 vol%, F                                 | 699.2              | 43.2                        | 123.1                | 257.7                | 405.3           | 553.1         | 844.8                 | 1,225.4               |
| 70 vol%, F                                 | 814.4              | 46.5                        | 128.4                | 268.3                | 414.2           | 563.9         | 875.3                 | 1,276.3               |
| 80 vol%, F                                 | 939.6              | 49.1                        | 135.1                | 279.4                | 424.0           | 575.5         | 905.9                 | 1,331.5               |
| 90 vol%, F                                 | 1,085.9            | 47.8                        | 139.5                | 290.9                | 434.1           | 587.6         | 934.0                 | 1,387.0               |
| 95 vol%, F                                 | 1,216.2            | 47.5                        | 143.2                | 297.3                | 439.8           | 594.3         | 950.4                 | 1,420.2               |
| ASTM EP, F                                 | 1,398.6            | 48.6                        | 146.5                | 302.5                | 444.5           | 605.0         | 969.8                 | 1,457.4               |
| Freeze point, F                            |                    |                             |                      |                      | -52.10          | 13.80         |                       |                       |
| Smoke point, mm                            |                    |                             |                      |                      | 21.50           |               |                       |                       |
| Naphthalenes (D1840), vol%                 |                    |                             |                      |                      | 2.40            |               |                       |                       |
| Viscosity at 100C/212F, cSt                | 2.32               | 0.21                        | 0.23                 | 0.37                 | 0.70            | 1.50          | 7.84                  | 4,081.63              |
| Viscosity at 150C/302F, cSt                | 1.37               | 0.17                        | 0.18                 | 0.27                 | 0.48            | 0.90          | 3.01                  | 189.11                |
| Cetane Index 1990 (D4737),                 | 29.70              | 113.30                      | 50.60                | 29.30                | 39.80           | 48.10         | 48.10                 | 28.50                 |
| Cloud point, F                             |                    |                             |                      |                      | -60.00          | 7.00          |                       |                       |
| Aniline pt, F                              |                    |                             |                      |                      | 130.30          | 148.30        | 173.60                |                       |

Source: ExxonMobil Refining & Supply. "Crude Oil Information: Crudes by American Petroleum Institute Gravity." ExxonMobil Refining & Supply website. Web. 13 June 2013.  
[http://www.exxonmobil.com/crudeoil/about\\_crudes\\_api.aspx](http://www.exxonmobil.com/crudeoil/about_crudes_api.aspx)

| Hungo Blend                                | Whole crude  | Butane & Lighter | Light Naphtha | Heavy Naphtha | Kerosene   | Diesel     | Vacuum Gas Oil | Vacuum Residue |
|--------------------------------------------|--------------|------------------|---------------|---------------|------------|------------|----------------|----------------|
| Distillation Range, F                      | -200 to 1499 | -200 to 60       | 60 to 165     | 165 to 330    | 330 to 480 | 480 to 650 | 650 to 1000    | 1000 to 1499   |
| Cut volume, %                              | 100.00       | 1.33             | 4.24          | 12.29         | 13.11      | 15.96      | 31.23          | 21.85          |
| API Gravity,                               | 28.30        | 121.03           | 79.73         | 55.05         | 41.02      | 32.65      | 21.20          | 7.77           |
| Specific Gravity (60/60F),                 | 0.8855       | 0.5603           | 0.6699        | 0.7585        | 0.8202     | 0.8620     | 0.9266         | 1.0160         |
| Carbon, wt %                               |              | 82.44            | 83.83         | 85.44         | 86.39      | 86.47      | 86.79          |                |
| Hydrogen, wt %                             | 12.93        | 17.56            | 16.17         | 14.55         | 13.53      | 13.21      | 12.31          |                |
| Pour point, F                              | -19.00       |                  |               |               | -75.00     | 4.00       | 89.00          | 108.00         |
| Neutralization number (TAN), MG/GM         | 0.4700       |                  |               |               |            | 0.6340     | 0.7490         | 0.3560         |
| Sulfur, wt%                                | 0.6410       |                  |               | 0.0138        | 0.0781     | 0.3126     | 0.7550         | 1.3325         |
| Viscosity at 20C/68F, cSt                  | 32.96        | 0.29             | 0.34          | 0.70          | 1.83       | 7.64       | 299.32         | 7.55E+08       |
| Viscosity at 40C/104F, cSt                 | 14.41        | 0.25             | 0.29          | 0.56          | 1.30       | 4.22       | 78.38          | 9.58E+06       |
| Viscosity at 50C/122F, cSt                 | 10.34        | 0.24             | 0.27          | 0.50          | 1.12       | 3.33       | 46.32          | 1.68E+06       |
| Mercaptan sulfur, ppm                      | 6.00         |                  |               | 1.50          | 0.90       |            |                |                |
| Nitrogen, ppm                              | 2,640.00     | 0.10             | 0.10          | 1.40          | 15.00      | 92.80      | 1,438.80       | 8,567.30       |
| CCR, wt%                                   | 5.64         |                  |               |               |            | 0.00       | 0.47           | 21.82          |
| N-Heptane Insolubles (C7 Asphaltenes), wt% |              |                  |               |               |            |            |                | 3.60           |
| Nickel, ppm                                | 18.00        |                  |               |               |            | 0.00       | 0.10           | 71.50          |
| Vanadium, ppm                              | 15.00        |                  |               |               |            | 0.00       | 0.00           | 59.60          |
| Calcium, ppm                               | 0.50         |                  |               |               |            |            |                |                |
| Reid Vapor Pressure (RVP) Whole Crude, psi | 5.40         |                  |               |               |            |            |                |                |
| Heat of Combustion (Gross), BTU/lb         | 19,116       |                  |               |               |            |            |                |                |
| Heat of Combustion (Net), BTU/lb           | 17,944       | 19,334           | 18,871        | 18,635        | 18,509     |            |                |                |
| Hydrogen Sulfide (dissolved), ppm          | 0.00         |                  |               |               |            |            |                |                |
| Salt content, ptb                          | 20.00        |                  |               |               |            |            |                |                |
| Paraffins, vol %                           |              | 100.00           | 83.91         | 42.53         | 34.71      | 30.40      | 16.35          |                |
| Naphthenes, vol %                          |              | 0.00             | 15.86         | 49.81         | 42.67      | 42.85      | 30.80          |                |
| Aromatics (FIA), vol %                     |              |                  |               | 7.65          | 15.53      |            |                |                |
| Distillation type, D-                      | 1160         | 86               | 86            | 86            | 86         | 86         | 1160           | 1160           |
| ASTM IBP, F                                | 17.8         | -114.3           | 95.3          | 208.4         | 364.4      | 506.1      | 691.3          | 1,038.7        |
| 5 vol%, F                                  | 151.5        | -78.0            | 100.0         | 214.4         | 369.1      | 511.0      | 696.3          | 1,043.4        |
| 10 vol%, F                                 | 228.2        | -34.6            | 103.2         | 218.2         | 371.6      | 513.2      | 709.2          | 1,055.2        |
| 20 vol%, F                                 | 351.5        | 15.0             | 106.0         | 225.7         | 377.3      | 519.3      | 734.7          | 1,080.9        |
| 30 vol%, F                                 | 457.3        | 28.3             | 110.3         | 233.5         | 384.0      | 526.8      | 762.2          | 1,110.6        |
| 40 vol%, F                                 | 558.1        | 32.4             | 113.8         | 241.8         | 391.5      | 535.8      | 790.6          | 1,144.9        |
| 50 vol%, F                                 | 666.5        | 32.3             | 118.9         | 249.6         | 398.7      | 544.3      | 820.1          | 1,184.3        |
| 60 vol%, F                                 | 780.0        | 36.2             | 126.7         | 258.9         | 407.1      | 554.3      | 849.1          | 1,231.9        |
| 70 vol%, F                                 | 882.1        | 41.0             | 132.3         | 268.9         | 415.6      | 564.9      | 877.9          | 1,283.7        |
| 80 vol%, F                                 | 996.4        | 44.9             | 137.8         | 279.8         | 425.1      | 576.3      | 907.5          | 1,339.0        |
| 90 vol%, F                                 | 1,135.7      | 44.3             | 141.0         | 291.1         | 434.7      | 588.0      | 935.1          | 1,395.8        |
| 95 vol%, F                                 | 1,258.2      | 44.9             | 143.8         | 297.4         | 440.2      | 594.5      | 951.5          | 1,431.1        |
| ASTM EP, F                                 | 1,414.4      | 46.3             | 146.4         | 302.6         | 444.8      | 605.1      | 970.5          | 1,458.5        |
| Freeze point, F                            |              |                  |               |               | -58.90     | 18.80      |                |                |
| Smoke point, mm                            |              |                  |               |               | 24.00      |            |                |                |
| Naphthalenes (D1840), vol%                 |              |                  |               |               | 1.90       |            |                |                |
| Viscosity at 100C/212F, cSt                | 3.28         | 0.18             | 0.20          | 0.32          | 0.64       | 1.46       | 8.01           | 4,878.67       |
| Viscosity at 150C/302F, cSt                | 1.69         | 0.14             | 0.16          | 0.23          | 0.43       | 0.87       | 3.05           | 214.44         |
| Cetane Index 1990 (D4737),                 | 26.60        | 146.30           | 39.20         | 29.80         | 40.00      | 51.00      | 48.20          | 30.70          |
| Cloud point, F                             |              |                  |               |               | -67.00     | 12.00      |                |                |
| Aniline pt, F                              |              |                  |               |               | 134.10     | 150.60     | 168.50         |                |

Source: ExxonMobil Refining & Supply. "Crude Oil Information: Crudes by American Petroleum Institute Gravity." ExxonMobil Refining & Supply website. Web. 13 June 2013.  
[http://www.exxonmobil.com/crudeoil/about\\_crudes\\_api.aspx](http://www.exxonmobil.com/crudeoil/about_crudes_api.aspx)

| <b>Cold Lake Blend</b>                     | <b>Whole crude</b> | <b>Butane &amp; Lighter</b> | <b>Light Naphtha</b> | <b>Heavy Naphtha</b> | <b>Kerosene</b> | <b>Diesel</b> | <b>Vacuum Gas Oil</b> | <b>Vacuum Residue</b> |
|--------------------------------------------|--------------------|-----------------------------|----------------------|----------------------|-----------------|---------------|-----------------------|-----------------------|
| Distillation Range, F                      | -200 to 1499       | -200 to 60                  | 60 to 165            | 165 to 330           | 330 to 480      | 480 to 650    | 650 to 1000           | 1000 to 1499          |
| Cut volume, %                              | 100.00             | 0.65                        | 11.19                | 6.91                 | 5.92            | 11.02         | 28.66                 | 35.65                 |
| API Gravity,                               | 19.71              | 113.01                      | 89.21                | 57.80                | 37.88           | 26.07         | 15.27                 | 1.14                  |
| Specific Gravity (60/60F),                 | 0.9358             | 0.5787                      | 0.6411               | 0.7475               | 0.8354          | 0.8980        | 0.9641                | 1.0668                |
| Carbon, wt %                               |                    | 82.65                       | 83.54                | 85.56                | 86.16           | 85.78         | 85.07                 |                       |
| Hydrogen, wt %                             |                    | 17.35                       | 16.46                | 14.44                | 13.30           | 12.24         | 11.40                 |                       |
| Pour point, F                              | -37.00             |                             |                      |                      | -115.00         | -51.00        | 34.00                 | 124.00                |
| Neutralization number (TAN), MG/GM         | 1.0180             |                             |                      |                      |                 | 0.6670        | 1.6550                | 0.9940                |
| Sulfur, wt%                                | 3.8177             |                             |                      | 0.0860               | 0.6814          | 1.9316        | 3.2888                | 6.0816                |
| Viscosity at 20C/68F, cSt                  |                    | 0.31                        | 0.35                 | 0.70                 | 2.12            | 11.00         | 1,311.68              | 7.82E+12              |
| Viscosity at 40C/104F, cSt                 |                    | 0.27                        | 0.30                 | 0.57                 | 1.50            | 5.56          | 224.04                | 1.31E+10              |
| Viscosity at 50C/122F, cSt                 |                    | 0.25                        | 0.28                 | 0.52                 | 1.29            | 4.24          | 113.11                | 1.03E+09              |
| Mercaptan sulfur, ppm                      | 80.90              |                             |                      | 119.90               | 19.10           |               |                       |                       |
| Nitrogen, ppm                              |                    | 0.00                        | 0.00                 | 0.50                 | 18.40           | 97.30         | 1,521.50              | 7,854.00              |
| CCR, wt%                                   | 11.69              |                             |                      |                      |                 | 0.00          | 0.85                  | 27.88                 |
| N-Heptane Insolubles (C7 Asphaltenes), wt% |                    |                             |                      |                      |                 |               |                       | 19.90                 |
| Nickel, ppm                                | 61.90              |                             |                      |                      |                 | 0.00          | 0.10                  | 155.80                |
| Vanadium, ppm                              | 157.70             |                             |                      |                      |                 | 0.00          | 0.40                  | 384.30                |
| Calcium, ppm                               | 1.60               |                             |                      |                      |                 |               |                       |                       |
| Reid Vapor Pressure (RVP) Whole Crude, psi | 5.80               |                             |                      |                      |                 |               |                       |                       |
| Heat of Combustion (Gross), BTU/lb         | 18,211             |                             |                      |                      |                 |               |                       |                       |
| Heat of Combustion (Net), BTU/lb           | 17,150             | 19,316                      | 19,029               | 18,674               | 18,358          |               |                       |                       |
| Hydrogen Sulfide (dissolved), ppm          | 0.00               |                             |                      |                      |                 |               |                       |                       |
| Salt content, ptb                          | 10.60              |                             |                      |                      |                 |               |                       |                       |
| Paraffins, vol %                           |                    | 100.00                      | 93.80                | 52.93                | 21.39           | 12.19         | 7.21                  |                       |
| Naphthenes, vol %                          |                    | 0.00                        | 5.90                 | 35.55                | 56.48           | 50.02         | 27.26                 |                       |
| Aromatics (FIA), vol %                     |                    |                             |                      | 11.51                | 12.87           |               |                       |                       |
| Distillation type, D-                      | 1160               | 86                          | 86                   | 86                   | 86              | 86            | 1160                  | 1160                  |
| ASTM IBP, F                                |                    | 21.7                        | 86.8                 | 204.1                | 365.8           | 508.1         | 691.7                 | 1,040.8               |
| 5 vol%, F                                  |                    | 28.0                        | 91.1                 | 207.8                | 370.8           | 514.1         | 696.9                 | 1,046.4               |
| 10 vol%, F                                 |                    | 33.5                        | 94.7                 | 209.0                | 373.2           | 517.8         | 711.8                 | 1,065.6               |
| 20 vol%, F                                 |                    | 33.4                        | 94.6                 | 212.5                | 379.9           | 526.3         | 742.1                 | 1,104.9               |
| 30 vol%, F                                 |                    | 36.9                        | 96.1                 | 217.9                | 387.9           | 535.4         | 773.9                 | 1,145.8               |
| 40 vol%, F                                 |                    | 39.4                        | 99.2                 | 225.5                | 396.7           | 545.2         | 806.1                 | 1,189.9               |
| 50 vol%, F                                 |                    | 41.4                        | 102.5                | 234.5                | 404.1           | 553.3         | 837.4                 | 1,237.1               |
| 60 vol%, F                                 |                    | 45.0                        | 105.8                | 246.1                | 412.4           | 562.3         | 865.8                 | 1,286.8               |
| 70 vol%, F                                 |                    | 48.1                        | 110.8                | 259.1                | 420.2           | 571.4         | 892.8                 | 1,333.7               |
| 80 vol%, F                                 |                    | 50.4                        | 119.6                | 273.1                | 428.7           | 581.0         | 919.0                 | 1,378.4               |
| 90 vol%, F                                 |                    | 48.9                        | 129.8                | 287.3                | 436.8           | 590.6         | 941.6                 | 1,415.9               |
| 95 vol%, F                                 |                    | 48.4                        | 137.2                | 295.2                | 441.6           | 596.0         | 955.3                 | 1,437.1               |
| ASTM EP, F                                 |                    | 49.3                        | 149.0                | 307.2                | 445.5           | 600.5         | 971.5                 | 1,460.7               |
| Freeze point, F                            |                    |                             |                      |                      | -96.90          | -33.40        |                       |                       |
| Smoke point, mm                            |                    |                             |                      |                      | 20.10           |               |                       |                       |
| Naphthalenes (D1840), vol%                 |                    |                             |                      |                      | 0.70            |               |                       |                       |
| Viscosity at 100C/212F, cSt                |                    | 0.19                        | 0.21                 | 0.35                 | 0.74            | 1.68          | 12.32                 | 205,965.14            |
| Viscosity at 150C/302F, cSt                |                    | 0.15                        | 0.17                 | 0.26                 | 0.50            | 0.96          | 3.86                  | 2,227.44              |
| Cetane Index 1990 (D4737),                 |                    | 111.90                      | 58.30                | 30.90                | 34.80           | 37.80         | 33.70                 | 10.20                 |
| Cloud point, F                             |                    |                             |                      |                      | -105.00         | -42.00        |                       |                       |
| Aniline pt, F                              |                    |                             |                      |                      | 129.40          | 127.50        | 141.00                |                       |

Source: ExxonMobil Refining & Supply. "Crude Oil Information: Crudes by American Petroleum Institute Gravity." ExxonMobil Refining & Supply website. Web. 13 June 2013.  
[http://www.exxonmobil.com/crudeoil/about\\_crudes\\_api.aspx](http://www.exxonmobil.com/crudeoil/about_crudes_api.aspx)

**57 oxygenated compounds used for analysis**

DIMETHYL ETHER

METHYL ETHYL ETHER

ACETALDEHYDE

METHYL FORMATE

DIETHYL ETHER

N-PROPIONALDEHYDE

ACROLEIN

ETHYL FORMATE

METHYL-TERT-BUTYL ETHER

ACETONE

METHYL ACETATE

METHANOL

TETRAMYOROFURAN

METHACROLEIN

VINYL ACETATE

N-BUTYRALDEHYDE

ETHYL ACETATE

ETHANOL

METHYL ETHYL KETONE

N-PROPYL FORMATE

ISOPROPANOL

TERT-BUTANOL

ISOPROPYL ACETATE

N-PROPANOL

SEC-BUTANOL

FORMIC ACID

N-PROPYL ACETATE

DIETHYL KETONE

2-METHYL-2-BUTANOL

METHYL-N-PROPYL KETONE

METHYL N-BUTYRATE  
TRANS-CROTONALDEHYDE  
ISOBUTANOL  
3-METHYL-2-BUTANOL  
METHYL ISOBUTYL KETONE  
N-BUTANOL  
ACETIC ACID  
2-PENTANOL  
N-BUTYL ACETATE  
METHYL-N-BUTYL KETONE  
2-METHYL-1-BUTANOL  
4-METHYL-2-PENTANOL  
1-PENTANOL  
PROPIONIC ACID  
N-PENTYL ACETATE  
2-METHYLPROPIONIC ACID  
FURFURAL  
N-BUTYRIC ACID  
3-METHYLBUTYRIC ACID  
PHENOL  
N-PENTANOIC ACID  
1,2-PROPYLENE GLYCOL  
O-CRESOL  
P-CRESOL  
M-CRESOL  
N-HEXANOIC ACID  
DIETHYLENE GLYCOL  
TETRAETHYLENE GLYCOL
